# Supplementary material for: Insertion reactions of a two-coordinate iron diaryl with dioxygen and carbon monoxide
Source: Royal Society of Chemistry journal article supplement (doi:10.1039/b912312a), 2009-01-01
Supplement: b912312a.pdf [file b912312a.pdf]

## Supporting Information

### Insertion Reactions of a Two-Coordinate Iron Diaryl with Dioxygen and Carbon Monoxide

Chengbao Ni and Philip P. Power

*Department of Chemistry, University of California, Davis, California 95616*

#### 1. Magnetic Determination of **1** and **2** by Evans' method.

3.00 mg of **1** was dissolved in exactly 0.80 mL mixture of C<sub>6</sub>H<sub>6</sub> and C<sub>6</sub>D<sub>6</sub> ( $c = 4.407 \times 10^{-3}$  mol/L) and some solution was transferred into an NMR tube. Into the NMR tube, a sealed capillary that contained the C<sub>6</sub>H<sub>6</sub>/C<sub>6</sub>D<sub>6</sub> solvent mixture was placed. The NMR spectra were recorded on a Varian spectrometer operating at 300.077 MHz at 292.75 K. Two peaks were identified for C<sub>6</sub>H<sub>6</sub> protons, which have a chemical shift difference of 0.183 ppm. Based on the theory of Evans method,<sup>1,2</sup> the magnetic susceptibility was calculated to be  $9.905 \times 10^{-3}$  cm<sup>3</sup>mol<sup>-1</sup>, which corresponds to an effective magnetic moment of 4.82  $\mu_B$  per molecule for **1**.

5.18 mg of **2** was dissolved in exactly 0.80 mL mixture of C<sub>6</sub>H<sub>6</sub> and C<sub>6</sub>D<sub>6</sub> ( $c = 7.330 \times 10^{-3}$  mol/L) and some solution was transferred into an NMR tube. Into the NMR tube, a sealed capillary that contained the C<sub>6</sub>H<sub>6</sub>/C<sub>6</sub>D<sub>6</sub> solvent mixture was placed. The NMR spectra were recorded on a Varian spectrometer operating at 300.077 MHz at 292.75 K. Two peaks were identified for C<sub>6</sub>H<sub>6</sub> protons, which have a chemical shift difference of 0.366 ppm. Based on the theory of Evans method,<sup>1,2</sup> the magnetic susceptibility was calculated to be  $1.191 \times 10^{-2}$  cm<sup>3</sup>mol<sup>-1</sup>, which corresponds to an effective magnetic moment of 5.28  $\mu_B$  per molecule for **2**.

#### References:

1. Evans, D. F., *J. Chem. Soc.* **1959**, 2003.
2. Schubert, E. M., *J. Chem. Educ.* **1992**, 69, 62.
